# Supplementary material for: Functional Interplay Between Murine Leukemia Virus Glycogag, Serinc5, and Surface Glycoprotein Governs Virus Entry, with Opposite Effects on Gammaretroviral and Ebolavirus Glycoproteins
Source: PubMed Central journal article supplement (PMC5120145; doi:10.1128/mbio.01985-16), 2016-11-22

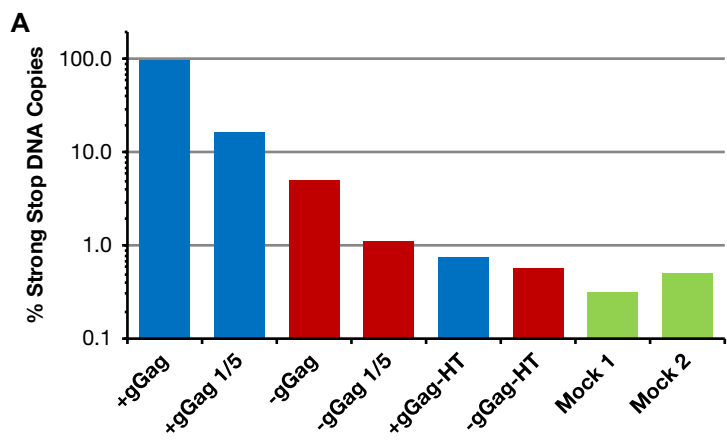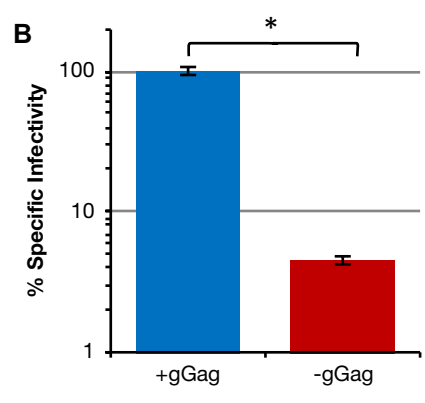

Supplement: mbo006163085sf4.pdf [file mbo006163085sf4.pdf]
